# Supplementary material for: Leadership in Moving Human Groups
Source: PLoS Comput Biol. 2014 Apr 3;10(4):e1003541. doi: 10.1371/journal.pcbi.1003541 (PMC3974633; doi:10.1371/journal.pcbi.1003541)
Supplement: Software S1 — Archive version of the software which was used for the experiment. (ZIP) [file pcbi.1003541.s002.zip]

Archive with 125 entries (117 files):
- HC-demo.bat
- HC-demo.sh
- HC_ClientAppl.jar
- HC_Gui.jar
- HC_Guide.pdf
- demo-config-files/
- demo-config-files/hc_client.config
- demo-config-files/hc_panel.config
- demo-config-files/hc_server.config
- intro/
- intro/de/
- intro/de/HC_Ende.html
- intro/de/HC_Willkommen.html
- intro/de/HC_spiel1_1.html
- intro/de/HC_spiel1_2.html
- intro/de/HC_spiel1_3.html
- intro/de/HC_spiel1_4.html
- intro/de/HC_spiel1_lokal1.html
- intro/de/HC_spiel1_lokal2.html
- intro/de/HC_spiel1_lokal3.html
- intro/de/HC_spiel1_lokal4.html
- intro/de/HC_spiel2_1.html
- intro/de/HC_spiel2_2.html
- intro/de/HC_spiel2_lokal1.html
- intro/de/HC_spiel2_lokal2.html
- intro/de/HC_spiel3_1.html
- intro/de/HC_spiel3_2.html
- intro/de/HC_spiel4_1.html
- intro/de/HC_spiel4_2.html
- intro/de/HC_spiel5_inf1.html
- intro/de/HC_spiel5_inf2.html
- intro/de/HC_spiel5_inf3.html
- intro/de/HC_spiel5_inf4.html
- intro/de/HC_spiel5_inf5.html
- intro/de/HC_spiel5_inf6.html
- intro/de/HC_spiel5_inf7.html
- intro/de/HC_spiel5_inf8.html
- intro/de/HC_spiel5_uninf1.html
- intro/de/HC_spiel5_uninf2.html
- intro/de/HC_spiel5_uninf3.html
- intro/de/HC_spiel5_uninf4.html
- intro/de/HC_spiel5_uninf5.html
- intro/de/bilder/
- intro/de/bilder/image000.jpg
- intro/de/bilder/image000a.jpg
- intro/de/bilder/image001.jpg
- intro/de/bilder/image001a.jpg
- intro/de/bilder/image002.jpg
- intro/de/bilder/image003.jpg
- intro/de/bilder/image003a.jpg
- intro/de/bilder/image003atail.jpg
- intro/de/bilder/image003tail.jpg
- intro/de/bilder/image004.jpg
- intro/de/bilder/image004a.jpg
- intro/de/bilder/image005.jpg
- intro/de/bilder/image005a.jpg
- intro/de/bilder/image006.jpg
- intro/de/bilder/image008.jpg
- intro/de/bilder/image008a.jpg
- intro/de/bilder/image009.jpg
- intro/de/bilder/image010.jpg
- intro/de/bilder/image011.jpg
- intro/de/bilder/image012.jpg
- intro/de/intros.css
- intro/en/
- intro/en/HC_Ende.html
- intro/en/HC_Willkommen.html
- intro/en/HC_spiel1_1.html
- intro/en/HC_spiel1_2.html
- intro/en/HC_spiel1_3.html
- intro/en/HC_spiel1_4.html
- intro/en/HC_spiel1_lokal1.html
- intro/en/HC_spiel1_lokal2.html
- intro/en/HC_spiel1_lokal3.html
- intro/en/HC_spiel1_lokal4.html
- intro/en/HC_spiel2_1.html
- intro/en/HC_spiel2_2.html
- intro/en/HC_spiel2_lokal1.html
- intro/en/HC_spiel2_lokal2.html
- intro/en/HC_spiel3_1.html
- intro/en/HC_spiel3_2.html
- intro/en/HC_spiel4_1.html
- intro/en/HC_spiel4_2.html
- intro/en/HC_spiel5_inf1.html
- intro/en/HC_spiel5_inf2.html
- intro/en/HC_spiel5_inf3.html
- intro/en/HC_spiel5_inf4.html
- intro/en/HC_spiel5_inf5.html
- intro/en/HC_spiel5_inf6.html
- intro/en/HC_spiel5_inf7.html
- intro/en/HC_spiel5_inf8.html
- intro/en/HC_spiel5_uninf1.html
- intro/en/HC_spiel5_uninf2.html
- intro/en/HC_spiel5_uninf3.html
- intro/en/HC_spiel5_uninf4.html
- intro/en/HC_spiel5_uninf5.html
- intro/en/bilder/
- intro/en/bilder/image000.jpg
- intro/en/bilder/image000a.jpg
- intro/en/bilder/image001.jpg
- intro/en/bilder/image001a.jpg
- intro/en/bilder/image002.jpg
- intro/en/bilder/image003.jpg
- intro/en/bilder/image003a.jpg
- intro/en/bilder/image003atail.jpg
- intro/en/bilder/image003tail.jpg
- intro/en/bilder/image004.jpg
- intro/en/bilder/image004a.jpg
- intro/en/bilder/image005.jpg
- intro/en/bilder/image005a.jpg
- intro/en/bilder/image006.jpg
- intro/en/bilder/image008.jpg
- intro/en/bilder/image008a.jpg
- intro/en/bilder/image009.jpg
- intro/en/bilder/image010.jpg
- intro/en/bilder/image011.jpg
- intro/en/bilder/image012.jpg
- intro/en/intros.css
- rawdata/
- rawdata/HC_2010-08-04_14-05-11.txt
- rawdata/HC_2010-08-04_14-05-11_MOVES.csv
- replicate-config-files/
- replicate-config-files/hc_client.config
- replicate-config-files/hc_panel.config
- replicate-config-files/hc_server.config
