# Supplementary material for: Leadership in Moving Human Groups
Source: PLoS Comput Biol. 2014 Apr 3;10(4):e1003541. doi: 10.1371/journal.pcbi.1003541 (PMC3974633; doi:10.1371/journal.pcbi.1003541)
Supplement: Software S1 — Archive version of the software which was used for the experiment. (ZIP) [file pcbi.1003541.s002.zip › demo-config-files/hc_client.config]

// game_client.config
testing		= 	true		// false: fullscreen  
autoRead    =   false       // false: user has  to click through intros, 
autoMove    =   false       // false: user has to click into the game-panel
ip_nr		=	localhost   // the ip of the server
language	=	en			// can be de for german or en for english	
dlg_timeout =   5           // display duration of the last message
