# Supplementary material for: Leadership in Moving Human Groups
Source: PLoS Comput Biol. 2014 Apr 3;10(4):e1003541. doi: 10.1371/journal.pcbi.1003541 (PMC3974633; doi:10.1371/journal.pcbi.1003541)
Supplement: Software S1 — Archive version of the software which was used for the experiment. (ZIP) [file pcbi.1003541.s002.zip › demo-config-files/hc_panel.config]

// config GamePanel Colors RGB
testing = true			// true: show coord in some fields
// colors    green shades for the playground,  red and yellow for the dots ...
c_bg	= 004000		// background	
c_fg	= 00FF00		// foreground tiling
c_nm	= 00FFFF		// number of moves 
c_ng	= FF00FF		// nuggets
c_vis	= 0000FF		// visRad
c_my	= FF0000		// my figure	
c_others= FFFF00		// other figures


n0		    = 10		// if more than n0 figures on the same field, display them smaller

tailLengthF = 3.0		// Factor for the length of the tails
tailWidthF  = 0.4		// factor for the width of the tails
my_zoom     = 2.0		// ZoomFactor for the players own avatar
lineWidth   = 3.0		// for the tiling stroke

radius	    = 40		// pixels radius of a single hexagon 
radiusPG    = 5			// radius of the playground measured in haxagons, should be an odd number
						//    corresponds with the same value in server_config

idelay5	    = 5000		// initial delay after starting, before a first move can be done
delay	    = 1000		// milliseconds, delay after every move
idle	    = 4000		// milliseconds, tail of a moved figure is shown for that time
