# Supplementary material for: Leadership in Moving Human Groups
Source: PLoS Comput Biol. 2014 Apr 3;10(4):e1003541. doi: 10.1371/journal.pcbi.1003541 (PMC3974633; doi:10.1371/journal.pcbi.1003541)
Supplement: Software S1 — Archive version of the software which was used for the experiment. (ZIP) [file pcbi.1003541.s002.zip › demo-config-files/hc_server.config]

// Config GameServer
timeshift	=	2		// to be added to UTC or GMT 

local		=	false	// treatment: local or global visibility 

n_Pl		=	2		// total number of players
n_InfPl		=	1		// number of informed players
opposed		=	1		// informed players will see double valued fiels 
						// 	    in same or opposite directions: 1 oder -1
radiusPG	= 	5		// radius of the playground measured in hexagons, 
						//		has to correspond to the value in panel.config 
visRad		=	1		// radius of visability, in effect only when local==true
m_Ex1		=	10		// minimum number of moves per player in game1
m_Ex2		=	10		// minimum number of moves per player in game2
m_Ex3		=	10		// maximum number of moves per player in game3
nug_Ex3		=	6		// number of doped fields  in game3
m_Ex4		=	10		// maximum number of moves per player in game4
nug_Ex4		=	6		// number of doped fields  in game4 
m_Ex5		=	10		// maximum number of moves per player in game5

v_nug3		=	0.5		// value of a nugget in Ex3
v_nug4		=	0.5		// value of a nugget in Ex4
v_nug5		= 	1.0		// value of a nugget in Ex5 for a non informed
v_nug5inf	= 	0.5		// value of a nugget in Ex5 for an informed
n_nug5inf	=	2		// number of nuggets on the higher doped fields
