# Supplementary material for: Leadership in Moving Human Groups
Source: PLoS Comput Biol. 2014 Apr 3;10(4):e1003541. doi: 10.1371/journal.pcbi.1003541 (PMC3974633; doi:10.1371/journal.pcbi.1003541)
Supplement: Software S1 — Archive version of the software which was used for the experiment. (ZIP) [file pcbi.1003541.s002.zip › intro/de/intros.css]

p {
	font-size: 1.3em;
	font-family: sans-serif;
	text-align: center;
}

h1 {
	font-size: 2em;
	font-family: sans-serif;
}

h2 {
	font-family: sans-serif;
	font-size: 1.4em;
}

td {
	margin: 10px;
	font-family: sans-serif;
	font-size: 1.2em;
}

img {
	margin: 10px text-align: center;
}

body {
	text-align: center;
	font-size: 1.5em;
}
