# Supplementary material for: Leadership in Moving Human Groups
Source: PLoS Comput Biol. 2014 Apr 3;10(4):e1003541. doi: 10.1371/journal.pcbi.1003541 (PMC3974633; doi:10.1371/journal.pcbi.1003541)
Supplement: Software S1 — Archive version of the software which was used for the experiment. (ZIP) [file pcbi.1003541.s002.zip › rawdata/HC_2010-08-04_14-05-11_MOVES.csv]

#gnr; time; pid; s1; s2
1; 14:10:33	390; -1; 0; 0;
1; 14:10:35	750; 5; 0; 1;
1; 14:10:36	953; 8; -1; 0;
1; 14:10:37	031; 6; -1; 0;
1; 14:10:37	500; 2; 1; 0;
1; 14:10:38	046; 5; 1; 2;
1; 14:10:38	484; 9; 0; 1;
1; 14:10:40	234; 4; -1; 0;
1; 14:10:40	250; 5; 2; 3;
1; 14:10:40	890; 7; -1; 0;
1; 14:10:40	906; 8; -1; 0;; not_moved
1; 14:10:41	328; 6; -1; 0;; not_moved
1; 14:10:41	328; 8; -2; -1;
1; 14:10:41	375; 9; -1; 1;
1; 14:10:41	546; 2; 1; 0;; not_moved
1; 14:10:41	703; 0; -1; 0;
1; 14:10:43	515; 3; 1; 0;
1; 14:10:44	281; 4; -1; 0;; not_moved
1; 14:10:44	281; 9; 0; 2;
1; 14:10:44	281; 5; 2; 3;; not_moved
1; 14:10:44	296; 2; 1; -1;
1; 14:10:45	046; 7; -1; 0;; not_moved
1; 14:10:45	062; 5; 2; 4;
1; 14:10:45	203; 8; -2; -1;; not_moved
1; 14:10:45	921; 0; -1; 0;; not_moved
1; 14:10:46	578; 8; -2; -2;
1; 14:10:47	125; 1; 1; 1;
1; 14:10:47	562; 3; 1; 0;; not_moved
1; 14:10:47	656; 4; -1; -1;
1; 14:10:48	218; 7; -1; 1;
1; 14:10:48	218; 9; 0; 2;; not_moved
1; 14:10:48	312; 2; 1; -1;; not_moved
1; 14:10:49	093; 2; 0; -2;
1; 14:10:49	093; 8; -2; -3;
1; 14:10:49	093; 5; 1; 3;
1; 14:10:49	750; 9; 0; 3;
1; 14:10:51	171; 1; 1; 1;; not_moved
1; 14:10:51	171; 5; 0; 3;
1; 14:10:51	937; 4; -1; -1;; not_moved
1; 14:10:51	937; 9; 1; 4;
1; 14:10:52	078; 7; -1; 1;; not_moved
1; 14:10:52	375; 3; 2; 0;
1; 14:10:53	031; 2; 0; -2;; not_moved
1; 14:10:53	031; 8; -2; -3;; not_moved
1; 14:10:53	796; 6; -2; 0;
1; 14:10:53	796; 5; -1; 3;
1; 14:10:53	796; 8; -2; -4;
1; 14:10:54	453; 9; 1; 5;
1; 14:10:55	000; 2; 1; -2;
1; 14:10:56	312; 3; 2; 0;; not_moved
1; 14:10:56	750; 9; 0; 5;
1; 14:10:57	406; 2; 2; -1;
1; 14:10:57	484; 7; 0; 2;
1; 14:10:57	515; 5; -2; 2;
1; 14:10:57	843; 6; -2; 0;; not_moved
1; 14:10:57	843; 8; -2; -4;; not_moved
1; 14:10:57	984; 8; -1; -4;
1; 14:10:59	703; 2; 3; -1;
1; 14:10:59	828; 9; 0; 4;
1; 14:11:00	250; 7; 0; 1;
1; 14:11:00	906; 8; 0; -4;
1; 14:11:01	671; 5; -2; 2;; not_moved
1; 14:11:01	781; 6; -3; 0;
1; 14:11:02	437; 5; -3; 1;
1; 14:11:02	437; 4; -1; -2;
1; 14:11:02	437; 9; 0; 3;
1; 14:11:03	421; 8; 1; -3;
1; 14:11:03	515; 2; 3; -1;; not_moved
1; 14:11:04	296; 7; 0; 1;; not_moved
1; 14:11:04	421; 5; -4; 0;
1; 14:11:04	843; 3; 3; 0;
1; 14:11:04	843; 9; 0; 2;
1; 14:11:05	062; 2; 3; 0;
1; 14:11:05	609; 7; 0; 0;
1; 14:11:06	046; 6; -3; 0;; not_moved
1; 14:11:06	593; 4; -1; -2;; not_moved
1; 14:11:06	593; 1; 2; 2;
1; 14:11:06	640; 8; 2; -2;
1; 14:11:06	921; 9; 1; 3;
1; 14:11:06	968; 5; -4; -1;
1; 14:11:07	468; 2; 4; 1;
1; 14:11:07	515; 3; 4; 0;
1; 14:11:09	109; 8; 3; -1;
1; 14:11:09	546; 3; 5; 0;
1; 14:11:09	546; 7; 0; 0;; not_moved
1; 14:11:09	734; 5; -5; -2;
1; 14:11:09	812; 2; 4; 2;
1; 14:11:10	093; 9; 2; 3;
1; 14:11:10	093; 7; -1; -1;
1; 14:11:10	750; 1; 2; 2;; not_moved
1; 14:11:11	843; 6; -4; 0;
1; 14:11:11	921; 5; -6; -3;
1; 14:11:11	921; 2; 5; 2;
1; 14:11:12	171; 3; 5; 1;
1; 14:11:12	187; 8; 4; 0;
1; 14:11:13	046; 9; 3; 3;
1; 14:11:13	046; 1; 3; 3;
1; 14:11:14	250; 7; -1; -1;; not_moved
1; 14:11:14	250; 5; -5; -3;
1; 14:11:14	796; 8; 4; 1;
1; 14:11:14	796; 2; 6; 3;
1; 14:11:14	843; 9; 3; 4;
1; 14:11:15	343; 1; 3; 4;
1; 14:11:15	781; 7; -1; 0;
1; 14:11:15	781; 6; -4; 0;; not_moved
1; 14:11:16	328; 3; 5; 1;; not_moved
1; 14:11:16	765; 2; 5; 3;
1; 14:11:16	765; 5; -5; -4;
1; 14:11:16	765; 9; 4; 4;
1; 14:11:17	640; 1; 3; 5;
1; 14:11:17	671; 3; 5; 2;
1; 14:11:18	296; 8; 4; 2;
1; 14:11:18	296; 4; 0; -1;
1; 14:11:19	171; 5; -4; -4;
1; 14:11:19	609; 9; 4; 3;
1; 14:11:19	609; 7; -1; 0;; not_moved
1; 14:11:20	812; 2; 5; 3;; not_moved
1; 14:11:20	812; 8; 4; 3;
1; 14:11:20	875; 6; -5; 0;
1; 14:11:21	468; 1; 2; 5;
1; 14:11:21	468; 7; 0; 0;
1; 14:11:21	906; 5; -3; -4;
1; 14:11:21	906; 9; 5; 3;
1; 14:11:21	906; 3; 5; 2;; not_moved
1; 14:11:22	343; 4; 0; -1;; not_moved
1; 14:11:23	109; 1; 1; 5;
1; 14:11:23	109; 2; 5; 4;
1; 14:11:23	187; 8; 3; 3;
1; 14:11:24	203; 0; -2; 0;
1; 14:11:25	078; 6; -5; 0;; not_moved
1; 14:11:25	078; 9; 4; 3;
1; 14:11:25	156; 5; -2; -3;
1; 14:11:25	625; 7; 0; 0;; not_moved
1; 14:11:25	640; 8; 2; 3;
1; 14:11:25	734; 3; 6; 3;
1; 14:11:26	171; 6; -4; 0;
1; 14:11:27	156; 1; 1; 5;; not_moved
1; 14:11:27	156; 2; 5; 4;; not_moved
1; 14:11:27	921; 0; -3; 0;
1; 14:11:27	921; 8; 2; 4;
1; 14:11:28	000; 9; 4; 2;
1; 14:11:28	468; 1; 0; 5;
1; 14:11:29	234; 3; 5; 3;
1; 14:11:29	234; 5; -1; -2;
1; 14:11:30	109; 6; -4; 0;; not_moved
1; 14:11:30	109; 8; 1; 4;
1; 14:11:30	546; 6; -3; 0;
1; 14:11:30	546; 1; -1; 4;
1; 14:11:30	546; 9; 5; 2;
1; 14:11:31	312; 5; -1; -3;
1; 14:11:31	640; 2; 4; 4;
1; 14:11:31	640; 7; 0; -1;
1; 14:11:31	968; 0; -3; 0;; not_moved
1; 14:11:31	984; 8; 0; 4;
1; 14:11:32	734; 1; -2; 3;
1; 14:11:32	765; 5; -1; -4;
1; 14:11:32	828; 9; 5; 1;
1; 14:11:33	281; 3; 5; 3;; not_moved
1; 14:11:33	281; 4; 1; 0;
1; 14:11:33	359; 6; -2; 0;
1; 14:11:33	828; 2; 5; 5;
1; 14:11:35	250; 5; 0; -4;
1; 14:11:35	796; 7; 0; -1;; not_moved
1; 14:11:36	234; 8; 0; 4;; not_moved
1; 14:11:36	234; 8; 0; 3;
1; 14:11:36	781; 1; -2; 3;; not_moved
1; 14:11:36	781; 6; -1; 0;
1; 14:11:36	921; 9; 5; 1;; not_moved
1; 14:11:37	437; 4; 1; 0;; not_moved
1; 14:11:37	875; 2; 5; 5;; not_moved
1; 14:11:38	531; 8; -1; 3;
1; 14:11:38	531; 7; 1; 0;
1; 14:11:38	578; 1; -3; 2;
1; 14:11:39	296; 5; 0; -4;; not_moved
1; 14:11:39	312; 9; 4; 0;
1; 14:11:39	328; 3; 4; 3;
1; 14:11:39	625; 5; 0; -5;
1; 14:11:39	625; 6; 0; 0;
1; 14:11:41	046; 8; -2; 2;
1; 14:11:41	078; 1; -4; 1;
1; 14:11:41	218; 5; 0; -4;
1; 14:11:41	593; 0; -4; 0;
1; 14:11:41	593; 9; 4; -1;
1; 14:11:42	687; 7; 1; 0;; not_moved
1; 14:11:42	687; 7; 1; 1;
1; 14:11:43	562; 3; 4; 3;; not_moved
1; 14:11:43	562; 8; -3; 1;
1; 14:11:43	656; 6; 0; 0;; not_moved
1; 14:11:44	109; 1; -5; 0;
1; 14:11:44	875; 0; -5; 0;
1; 14:11:44	921; 9; 4; 0;
1; 14:11:45	421; 5; 0; -4;; not_moved
1; 14:11:45	750; 2; 4; 5;
1; 14:11:45	781; 4; 1; 1;
1; 14:11:46	406; 5; 1; -3;
1; 14:11:46	406; 1; -5; -1;
1; 14:11:46	734; 7; 1; 1;; not_moved
1; 14:11:47	281; 9; 3; 0;
1; 14:11:47	281; 8; -2; 1;
1; 14:11:47	828; 0; -5; -1;
1; 14:11:47	828; 6; 1; 1;
1; 14:11:47	828; 3; 3; 3;
1; 14:11:49	250; 7; 0; 0;
1; 14:11:49	250; 8; -3; 0;
1; 14:11:49	687; 9; 3; -1;
1; 14:11:49	687; 2; 4; 5;; not_moved
1; 14:11:49	843; 4; 1; 1;; not_moved
1; 14:11:50	453; 5; 1; -3;; not_moved
1; 14:11:50	453; 1; -5; -1;; not_moved
1; 14:11:50	453; 0; -5; -2;
1; 14:11:51	328; 8; -4; 0;
1; 14:11:51	328; 1; -5; -2;
1; 14:11:51	328; 5; 1; -2;
1; 14:11:51	875; 9; 3; -2;
1; 14:11:51	875; 6; 1; 1;; not_moved
1; 14:11:51	875; 3; 3; 3;; not_moved
1; 14:11:52	234; 6; 0; 1;
1; 14:11:52	640; 4; 0; 0;
1; 14:11:53	296; 7; 0; 0;; not_moved
1; 14:11:53	359; 8; -4; -1;
1; 14:11:53	843; 0; -6; -3;
1; 14:11:53	843; 9; 2; -2;
1; 14:11:55	046; 1; -6; -3;
1; 14:11:55	234; 5; 0; -2;
1; 14:11:55	296; 9; 2; -3;
1; 14:11:55	406; 8; -4; -2;
1; 14:11:56	250; 6; 0; 1;; not_moved
1; 14:11:56	421; 0; -5; -3;
1; 14:11:56	515; 4; 0; 0;; not_moved
1; 14:11:57	234; 9; 1; -3;
1; 14:11:57	234; 6; 0; 0;
1; 14:11:57	234; 2; 3; 5;
1; 14:11:57	671; 8; -4; -3;
1; 14:11:58	984; 0; -5; -4;
1; 14:11:58	984; 1; -6; -3;; not_moved
1; 14:11:59	312; 2; 2; 4;
1; 14:11:59	312; 5; 0; -2;; not_moved
1; 14:11:59	312; 5; 1; -1;
1; 14:11:59	531; 9; 1; -4;
1; 14:11:59	640; 8; -3; -2;
1; 14:11:59	968; 7; -1; 0;
1; 14:12:00	515; 1; -5; -3;
1; 14:12:01	062; 2; 2; 3;
1; 14:12:01	390; 6; 0; 0;; not_moved
1; 14:12:01	718; 3; 2; 3;
1; 14:12:01	718; 8; -2; -1;
1; 14:12:02	265; 0; -5; -5;
1; 14:12:02	703; 2; 1; 2;
1; 14:12:02	734; 9; 1; -3;
1; 14:12:02	843; 4; 0; -1;
1; 14:12:03	250; 1; -5; -4;
1; 14:12:03	250; 6; 0; -1;
1; 14:12:03	281; 5; 0; -1;
1; 14:12:03	906; 7; -1; 0;; not_moved
1; 14:12:04	343; 7; -1; -1;
1; 14:12:04	343; 8; -1; 0;
1; 14:12:04	781; 3; 1; 2;
1; 14:12:04	812; 0; -4; -5;
1; 14:12:04	828; 9; 1; -2;
1; 14:12:06	750; 2; 1; 2;; not_moved
1; 14:12:06	750; 8; 0; 0;
1; 14:12:06	843; 9; 1; -1;
1; 14:12:07	078; 4; 0; -1;; not_moved
1; 14:12:07	078; 3; 0; 1;
1; 14:12:07	156; 7; 0; -1;
1; 14:12:07	406; 6; 0; -1;; not_moved
1; 14:12:07	406; 1; -5; -4;; not_moved
1; 14:12:07	406; 5; 0; 0;
1; 14:12:08	062; 0; -3; -5;
1; 14:12:08	828; 8; 0; -1;
1; 14:12:09	156; 9; 1; 0;
1; 14:12:09	156; 7; 0; 0;
1; 14:12:09	812; 3; 0; 0;
1; 14:12:10	359; 2; 1; 3;
1; 14:12:10	906; 8; -1; -2;
1; 14:12:11	031; 0; -3; -6;
1; 14:12:11	343; 9; 1; 1;
1; 14:12:11	390; 5; 0; 0;; not_moved
1; 14:12:12	000; 2; 0; 3;
1; 14:12:12	875; 4; -1; -2;
1; 14:12:13	031; 8; -2; -2;
1; 14:12:13	078; 5; 1; 1;
1; 14:12:13	187; 7; 0; 0;; not_moved
1; 14:12:13	531; 9; 1; 2;
1; 14:12:13	968; 0; -2; -5;
1; 14:12:13	968; 3; 0; 0;; not_moved
1; 14:12:14	515; 6; -1; -1;
1; 14:12:15	500; 5; 0; 1;
1; 14:12:15	500; 8; -3; -2;
1; 14:12:15	500; 9; 0; 1;
1; 14:12:15	828; 1; -5; -5;
1; 14:12:15	906; 2; 0; 3;; not_moved
1; 14:12:16	921; 4; -1; -2;; not_moved
1; 14:12:17	359; 2; -1; 2;
1; 14:12:17	359; 0; -1; -5;
1; 14:12:17	359; 9; 0; 0;
1; 14:12:17	687; 5; -1; 0;
1; 14:12:17	687; 8; -4; -3;
1; 14:12:17	718; 6; -2; -2;
1; 14:12:19	000; 9; -1; -1;
1; 14:12:19	765; 1; -5; -5;; not_moved
1; 14:12:19	765; 8; -4; -4;
1; 14:12:20	421; 6; -3; -3;
1; 14:12:20	453; 0; 0; -5;
1; 14:12:20	859; 1; -4; -5;
1; 14:12:21	296; 9; -1; -2;
1; 14:12:21	296; 2; -1; 2;; not_moved
1; 14:12:21	296; 4; -2; -2;
2; 14:13:43	234; -1; 0; 0;
2; 14:13:46	062; 1; 0; 1;
2; 14:13:46	062; 8; 0; -1;
2; 14:13:47	046; 6; -1; -1;
2; 14:13:47	078; 9; 1; 0;
2; 14:13:47	703; 7; 1; 0;
2; 14:13:47	703; 3; -1; 0;
2; 14:13:47	921; 1; 0; 2;
2; 14:13:48	250; 2; 0; 1;
2; 14:13:48	687; 8; 0; -2;
2; 14:13:48	687; 5; 1; 1;
2; 14:13:49	890; 7; 2; 1;
2; 14:13:49	906; 6; -1; -2;
2; 14:13:50	765; 5; 1; 2;
2; 14:13:50	765; 0; 0; -1;
2; 14:13:50	984; 3; -2; -1;
2; 14:13:51	125; 9; 1; 0;; not_moved
2; 14:13:51	171; 2; -1; 1;
2; 14:13:51	859; 4; -1; -1;
2; 14:13:51	859; 1; 0; 2;; not_moved
2; 14:13:51	984; 7; 3; 1;
2; 14:13:52	187; 8; -1; -3;
2; 14:13:52	515; 9; 0; 0;
2; 14:13:53	281; 2; -2; 0;
2; 14:13:53	453; 3; -2; -2;
2; 14:13:53	625; 6; -1; -3;
2; 14:13:54	265; 0; -1; -1;
2; 14:13:54	265; 5; 2; 2;
2; 14:13:54	375; 8; -2; -3;
2; 14:13:54	593; 7; 2; 0;
2; 14:13:55	359; 4; -1; 0;
2; 14:13:55	359; 9; 1; 0;
2; 14:13:56	015; 1; 0; 3;
2; 14:13:56	187; 0; -2; -2;
2; 14:13:56	218; 6; -2; -3;
2; 14:13:56	453; 5; 2; 1;
2; 14:13:56	468; 7; 1; -1;
2; 14:13:56	890; 3; -2; -3;
2; 14:13:56	890; 2; -3; 0;
2; 14:13:57	109; 8; -3; -3;
2; 14:13:57	984; 0; -2; -3;
2; 14:13:57	984; 5; 1; 0;
2; 14:13:58	859; 7; 0; -2;
2; 14:13:58	859; 9; 0; 0;
2; 14:13:59	296; 4; -1; 1;
2; 14:13:59	296; 8; -3; -2;
2; 14:13:59	296; 2; -4; -1;
2; 14:13:59	515; 6; -2; -2;
2; 14:13:59	843; 1; -1; 3;
2; 14:14:00	937; 3; -2; -3;; not_moved
2; 14:14:00	937; 3; -3; -4;
2; 14:14:01	078; 7; -1; -2;
2; 14:14:01	375; 0; -2; -4;
2; 14:14:01	453; 9; 0; 1;
2; 14:14:01	703; 2; -5; -1;
2; 14:14:01	781; 6; -1; -1;
2; 14:14:02	140; 8; -3; -1;
2; 14:14:02	140; 5; 1; 0;; not_moved
2; 14:14:02	343; 5; 1; -1;
2; 14:14:03	343; 4; -1; 1;; not_moved
2; 14:14:03	343; 2; -4; 0;
2; 14:14:03	406; 0; -2; -5;
2; 14:14:03	890; 1; -1; 3;; not_moved
2; 14:14:03	890; 1; -2; 2;
2; 14:14:04	328; 8; -2; -1;
2; 14:14:04	328; 7; -2; -2;
2; 14:14:04	406; 3; -3; -5;
2; 14:14:04	406; 6; -1; 0;
2; 14:14:05	093; 9; 1; 1;
2; 14:14:05	640; 0; -3; -5;
2; 14:14:05	640; 5; 0; -2;
2; 14:14:06	296; 1; -3; 1;
2; 14:14:06	296; 6; -1; 1;
2; 14:14:06	734; 8; -1; 0;
2; 14:14:06	750; 4; -2; 0;
2; 14:14:07	500; 2; -4; 0;; not_moved
2; 14:14:07	656; 5; -1; -2;
2; 14:14:07	812; 7; -1; -1;
2; 14:14:07	890; 0; -3; -4;
2; 14:14:07	968; 2; -3; 0;
2; 14:14:08	484; 9; 2; 1;
2; 14:14:08	484; 3; -3; -5;; not_moved
2; 14:14:09	031; 3; -2; -4;
2; 14:14:09	156; 8; -1; 1;
2; 14:14:09	468; 6; 0; 1;
2; 14:14:10	015; 5; -1; -1;
2; 14:14:10	453; 1; -3; 1;; not_moved
2; 14:14:10	515; 2; -2; 1;
2; 14:14:10	890; 9; 1; 0;
2; 14:14:10	890; 4; -2; 0;; not_moved
2; 14:14:10	890; 0; -2; -4;
2; 14:14:11	328; 6; 1; 1;
2; 14:14:11	328; 7; 0; 0;
2; 14:14:11	765; 8; -2; 1;
2; 14:14:12	312; 3; -1; -4;
2; 14:14:12	312; 5; -1; 0;
2; 14:14:12	750; 2; -1; 1;
2; 14:14:13	187; 9; 0; -1;
2; 14:14:13	359; 0; -1; -4;
2; 14:14:13	406; 1; -4; 0;
2; 14:14:13	531; 6; 1; 0;
2; 14:14:14	281; 8; -1; 2;
2; 14:14:14	281; 2; 0; 2;
2; 14:14:14	937; 7; 0; 1;
2; 14:14:14	937; 5; -2; 0;
2; 14:14:15	375; 4; -3; -1;
2; 14:14:16	031; 0; -1; -3;
2; 14:14:16	046; 9; -1; -1;
2; 14:14:16	171; 8; 0; 2;
2; 14:14:16	468; 3; -1; -4;; not_moved
2; 14:14:16	531; 6; 1; -1;
2; 14:14:16	546; 5; -3; -1;
2; 14:14:17	015; 7; 1; 2;
2; 14:14:17	203; 3; 0; -3;
2; 14:14:17	562; 1; -4; 0;; not_moved
2; 14:14:18	328; 6; 0; -1;
2; 14:14:18	328; 0; 0; -3;
2; 14:14:18	328; 2; 0; 2;; not_moved
2; 14:14:18	328; 8; 1; 2;
2; 14:14:18	343; 9; -1; 0;
2; 14:14:18	390; 2; 1; 2;
2; 14:14:18	656; 7; 2; 2;
2; 14:14:18	656; 1; -4; -1;
2; 14:14:19	421; 4; -3; -1;; not_moved
2; 14:14:19	968; 9; 0; 1;
2; 14:14:20	406; 5; -4; -1;
2; 14:14:20	406; 7; 2; 1;
2; 14:14:20	406; 0; -1; -4;
2; 14:14:20	562; 8; 1; 3;
2; 14:14:20	734; 6; -1; -1;
2; 14:14:21	390; 3; 0; -3;; not_moved
2; 14:14:21	937; 1; -4; -2;
2; 14:14:22	265; 2; 2; 3;
2; 14:14:22	328; 3; 1; -2;
2; 14:14:22	812; 0; -1; -3;
2; 14:14:22	812; 8; 2; 3;
2; 14:14:23	250; 7; 2; 0;
2; 14:14:23	250; 5; -3; 0;
2; 14:14:24	015; 4; -3; -2;
2; 14:14:24	015; 9; 1; 2;
2; 14:14:24	031; 6; -2; -1;
2; 14:14:24	562; 1; -4; -3;
2; 14:14:24	562; 0; -1; -2;
2; 14:14:25	328; 2; 3; 3;
2; 14:14:25	328; 8; 3; 3;
2; 14:14:25	484; 5; -3; 1;
2; 14:14:25	765; 7; 1; -1;
2; 14:14:26	093; 9; 2; 2;
2; 14:14:26	171; 3; 1; -1;
2; 14:14:26	171; 6; -3; -1;
2; 14:14:26	187; 0; -1; -1;
2; 14:14:27	515; 8; 2; 2;
2; 14:14:27	703; 5; -2; 2;
2; 14:14:27	906; 4; -3; -2;; not_moved
2; 14:14:27	984; 0; -1; 0;
2; 14:14:28	000; 9; 3; 2;
2; 14:14:28	281; 7; 0; -1;
2; 14:14:28	281; 2; 4; 4;
2; 14:14:28	281; 1; -4; -4;
2; 14:14:29	375; 4; -2; -2;
2; 14:14:29	453; 8; 3; 2;
2; 14:14:29	734; 6; -4; -1;
2; 14:14:29	734; 5; -1; 3;
2; 14:14:29	750; 7; -1; -2;
2; 14:14:30	140; 9; 4; 3;
2; 14:14:30	187; 3; 1; -1;; not_moved
2; 14:14:30	906; 3; 1; 0;
2; 14:14:30	906; 0; -2; 0;
2; 14:14:30	906; 1; -3; -4;
2; 14:14:31	343; 8; 2; 1;
2; 14:14:31	781; 2; 5; 4;
2; 14:14:31	812; 5; 0; 4;
2; 14:14:32	218; 9; 5; 4;
2; 14:14:32	218; 7; -2; -2;
2; 14:14:32	281; 6; -4; -2;
2; 14:14:32	984; 3; 1; 1;
2; 14:14:33	421; 4; -2; -2;; not_moved
2; 14:14:33	421; 2; 5; 3;
2; 14:14:33	468; 0; -3; 0;
2; 14:14:34	078; 6; -4; -3;
2; 14:14:34	203; 5; 1; 4;
2; 14:14:34	515; 8; 2; 0;
2; 14:14:34	515; 9; 4; 4;
2; 14:14:34	562; 4; -3; -3;
2; 14:14:35	062; 1; -3; -4;; not_moved
2; 14:14:35	218; 3; 1; 2;
2; 14:14:35	234; 7; -1; -1;
2; 14:14:35	609; 1; -2; -4;
2; 14:14:35	609; 6; -4; -4;
2; 14:14:36	046; 2; 6; 3;
2; 14:14:36	046; 0; -4; 0;
2; 14:14:36	156; 5; 2; 4;
2; 14:14:37	250; 8; 3; 1;
2; 14:14:37	250; 7; -1; 0;
2; 14:14:37	687; 1; -1; -4;
2; 14:14:37	687; 0; -5; 0;
2; 14:14:38	343; 6; -3; -4;
2; 14:14:38	343; 3; 0; 2;
2; 14:14:38	343; 5; 2; 3;
2; 14:14:38	562; 9; 4; 4;; not_moved
2; 14:14:38	562; 9; 3; 3;
2; 14:14:38	562; 2; 5; 2;
2; 14:14:38	562; 4; -3; -3;; not_moved
2; 14:14:39	875; 1; 0; -4;
2; 14:14:40	312; 5; 3; 3;
2; 14:14:40	437; 0; -5; -1;
2; 14:14:40	640; 7; 0; 1;
2; 14:14:40	640; 3; -1; 1;
2; 14:14:40	640; 4; -4; -4;
2; 14:14:40	640; 6; -2; -4;
2; 14:14:40	734; 9; 3; 4;
2; 14:14:41	406; 8; 3; 1;; not_moved
2; 14:14:41	406; 2; 4; 2;
2; 14:14:42	062; 8; 3; 2;
2; 14:14:42	609; 7; 1; 1;
2; 14:14:42	609; 5; 3; 2;
2; 14:14:43	046; 6; -1; -4;
2; 14:14:43	046; 3; 0; 1;
2; 14:14:43	046; 9; 2; 4;
2; 14:14:43	062; 0; -4; -1;
2; 14:14:43	593; 2; 3; 1;
2; 14:14:43	687; 1; 0; -4;; not_moved
2; 14:14:44	687; 6; 0; -3;
2; 14:14:44	687; 4; -4; -4;; not_moved
2; 14:14:44	734; 5; 3; 1;
2; 14:14:45	015; 1; 1; -3;
2; 14:14:45	015; 8; 2; 2;
2; 14:14:45	015; 9; 2; 5;
2; 14:14:45	234; 0; -3; -1;
2; 14:14:45	234; 7; 1; 0;
2; 14:14:45	234; 4; -4; -5;
2; 14:14:45	296; 2; 2; 1;
3; 14:16:06	078; -1; 0; 0;
3; 14:16:07	921; 7; 1; 0;
3; 14:16:08	015; 5; -1; -1;
3; 14:16:08	687; 3; -1; -1;
3; 14:16:09	234; 1; 0; 1;
3; 14:16:09	781; 2; 1; 0;
3; 14:16:10	109; 4; 0; 1;
3; 14:16:10	109; 8; -1; -1;
3; 14:16:11	203; 9; 0; -1;
3; 14:16:11	203; 1; 0; 2;
3; 14:16:11	218; 5; -2; -2;
3; 14:16:12	078; 7; 1; 0;; not_moved
3; 14:16:12	187; 2; 2; 1; cleared
3; 14:16:12	203; 8; -2; -1;
3; 14:16:12	250; 4; 1; 2;
3; 14:16:12	515; 6; 1; 1;
3; 14:16:12	578; 3; -1; -1;; not_moved
3; 14:16:12	953; 7; 2; 0;
3; 14:16:12	968; 0; -1; -1;
3; 14:16:13	390; 5; -3; -2;
3; 14:16:13	390; 3; -2; -2;
3; 14:16:14	046; 2; 3; 2;
3; 14:16:15	031; 8; -3; -1;
3; 14:16:15	062; 9; 0; -1;; not_moved
3; 14:16:15	359; 1; 0; 2;; not_moved
3; 14:16:15	359; 5; -4; -2;
3; 14:16:15	578; 6; 2; 2;
3; 14:16:15	578; 4; 2; 3;
3; 14:16:16	015; 3; -3; -3;
3; 14:16:16	062; 9; 0; -2;
3; 14:16:16	343; 1; -1; 2;
3; 14:16:17	000; 7; 2; 0;; not_moved
3; 14:16:17	078; 0; -1; -1;; not_moved
3; 14:16:17	546; 8; -4; -1;
3; 14:16:17	546; 5; -4; -1;
3; 14:16:17	984; 6; 3; 3;
3; 14:16:17	984; 2; 3; 2;; not_moved
3; 14:16:18	312; 7; 3; 0;
3; 14:16:19	406; 1; -2; 2;
3; 14:16:19	500; 5; -4; 0;
3; 14:16:19	734; 2; 3; 3;
3; 14:16:19	734; 4; 2; 3;; not_moved
3; 14:16:19	734; 3; -3; -4; cleared
3; 14:16:20	281; 9; 0; -2;; not_moved
3; 14:16:20	281; 9; 1; -2;
3; 14:16:20	500; 4; 1; 3;
3; 14:16:20	625; 7; 2; -1;
3; 14:16:20	937; 6; 4; 4;
3; 14:16:21	593; 3; -3; -5;
3; 14:16:21	593; 8; -4; -1;; not_moved
3; 14:16:21	609; 2; 3; 4;
3; 14:16:21	609; 5; -3; 1;
3; 14:16:22	031; 1; -3; 1;
3; 14:16:22	031; 0; -1; -2;
3; 14:16:23	015; 8; -4; 0;
3; 14:16:24	000; 6; 5; 5;
3; 14:16:24	000; 5; -2; 2;
3; 14:16:24	015; 9; 2; -2;
3; 14:16:24	015; 7; 1; -1;
3; 14:16:24	546; 4; 1; 3;; not_moved
3; 14:16:24	875; 2; 2; 3;
3; 14:16:25	421; 8; -3; 1;
3; 14:16:25	421; 4; 0; 3;
3; 14:16:25	640; 3; -3; -5;; not_moved
3; 14:16:25	640; 7; 0; -2;
3; 14:16:25	640; 6; 5; 4;
3; 14:16:26	078; 1; -3; 1;; not_moved
3; 14:16:26	078; 0; -1; -2;; not_moved
3; 14:16:26	078; 5; -2; 3;
3; 14:16:26	515; 3; -3; -6;
3; 14:16:26	953; 1; -3; 0;
3; 14:16:26	953; 0; -1; -3;
3; 14:16:27	390; 9; 1; -3;
3; 14:16:27	531; 6; 4; 3;
3; 14:16:27	828; 8; -2; 2;
3; 14:16:27	828; 7; -1; -2;
3; 14:16:28	265; 5; -1; 4;
3; 14:16:28	921; 2; 2; 3;; not_moved
3; 14:16:28	921; 3; -2; -5;
3; 14:16:29	140; 2; 2; 4;
3; 14:16:29	140; 6; 4; 2;
3; 14:16:29	578; 4; -1; 3;
3; 14:16:29	578; 1; -2; 0;
3; 14:16:30	343; 8; -1; 2;
3; 14:16:30	343; 5; 0; 5;
3; 14:16:31	109; 0; -1; -3;; not_moved
3; 14:16:31	125; 7; 0; -1;
3; 14:16:31	328; 3; -1; -4;
3; 14:16:31	328; 9; 1; -3;; not_moved
3; 14:16:31	875; 1; -3; -1;
3; 14:16:31	875; 6; 3; 1; cleared
3; 14:16:32	203; 9; 0; -4;
3; 14:16:32	203; 2; 1; 4;
3; 14:16:32	531; 5; 1; 5;
3; 14:16:32	859; 7; 0; 0;
3; 14:16:33	406; 4; -2; 2;
3; 14:16:33	546; 3; -1; -3;
3; 14:16:33	843; 8; 0; 3;
3; 14:16:34	281; 1; -3; -2;
3; 14:16:34	281; 2; 0; 3;
3; 14:16:34	828; 7; 0; 1;
3; 14:16:34	828; 5; 1; 4;
3; 14:16:35	046; 6; 2; 1; cleared
3; 14:16:36	359; 9; 0; -4;; not_moved
3; 14:16:36	375; 8; 1; 3;
3; 14:16:36	578; 4; -2; 1; cleared
3; 14:16:36	578; 3; 0; -3;
3; 14:16:37	234; 1; -4; -3;
3; 14:16:37	234; 2; -1; 3;
3; 14:16:37	781; 5; 1; 3;
3; 14:16:38	328; 6; 1; 0;
3; 14:16:38	765; 9; 0; -3;
3; 14:16:38	765; 7; 1; 1;
3; 14:16:38	765; 3; 0; -4;
3; 14:16:39	312; 8; 2; 3;
3; 14:16:39	859; 5; 1; 2;
3; 14:16:40	187; 2; -2; 2;
3; 14:16:40	406; 6; 1; -1;
3; 14:16:40	406; 1; -3; -3;
3; 14:16:40	625; 4; -2; 1;; not_moved
3; 14:16:41	062; 4; -2; 0;
3; 14:16:41	062; 3; 1; -4; cleared
3; 14:16:41	500; 0; -1; -4;
3; 14:16:41	500; 8; 3; 4;
3; 14:16:42	156; 6; 2; -1;
3; 14:16:42	156; 7; 2; 1; cleared
3; 14:16:42	171; 2; -2; 1; cleared
3; 14:16:42	812; 9; 0; -3;; not_moved
3; 14:16:42	828; 1; -3; -4; cleared
3; 14:16:43	250; 9; -1; -3;
3; 14:16:43	406; 3; 2; -3;
3; 14:16:43	578; 8; 4; 4;
3; 14:16:43	593; 4; -3; -1;
3; 14:16:44	343; 6; 3; -1;
3; 14:16:44	484; 0; 0; -4;
3; 14:16:44	515; 2; -1; 1;
3; 14:16:45	109; 7; 3; 1; cleared
3; 14:16:46	093; 6; 3; -2;
3; 14:16:46	109; 8; 4; 3;
3; 14:16:46	859; 3; 3; -2;
3; 14:16:46	859; 0; 1; -3;
3; 14:16:47	078; 1; -3; -4;; not_moved
3; 14:16:47	078; 1; -2; -4;
3; 14:16:47	078; 7; 2; 1;
3; 14:16:47	093; 9; -2; -3;
3; 14:16:47	406; 2; -2; 0;
3; 14:16:47	843; 4; -3; -1;; not_moved
3; 14:16:47	843; 4; -3; -2;
3; 14:16:48	828; 7; 2; 0;
3; 14:16:48	828; 3; 4; -1;
3; 14:16:49	703; 2; -2; -1;
3; 14:16:49	781; 8; 3; 2;
3; 14:16:50	250; 0; 2; -2;
3; 14:16:50	281; 4; -4; -3;
3; 14:16:51	125; 9; -3; -4; cleared
3; 14:16:51	125; 1; -2; -4;; not_moved
3; 14:16:52	765; 4; -5; -3;
3; 14:16:53	203; 0; 3; -1;
3; 14:16:53	203; 1; -1; -3;
3; 14:16:55	281; 9; -3; -4;; not_moved
3; 14:16:56	046; 9; -4; -4;
3; 14:16:56	046; 0; 4; 0;
3; 14:16:56	921; 4; -5; -3;; not_moved
3; 14:16:57	250; 1; 0; -3;
3; 14:16:57	906; 4; -5; -2;
3; 14:16:59	109; 9; -4; -3;
3; 14:16:59	109; 0; 4; 1;
3; 14:17:01	296; 9; -5; -3;
3; 14:17:02	062; 4; -5; -2;; not_moved
3; 14:17:02	062; 0; 4; 2;
3; 14:17:02	718; 4; -4; -1;
3; 14:17:03	703; 9; -4; -2;
3; 14:17:05	234; 0; 4; 3;
3; 14:17:06	109; 9; -3; -2;
3; 14:17:08	078; 0; 4; 4;
3; 14:17:10	265; 0; 3; 4;
3; 14:17:12	234; 0; 2; 4;
4; 14:18:09	218; -1; 0; 0;
4; 14:18:10	421; 3; -1; -1;
4; 14:18:10	750; 6; -1; 0;
4; 14:18:10	750; 0; 0; 1;
4; 14:18:10	812; 5; 1; 0; cleared
4; 14:18:11	187; 4; -1; 0;
4; 14:18:11	406; 1; 1; 1;
4; 14:18:11	734; 7; 0; -1;
4; 14:18:11	734; 8; 1; 0;
4; 14:18:13	046; 2; 0; 1;
4; 14:18:13	046; 0; 0; 2;
4; 14:18:13	062; 4; -2; 0;
4; 14:18:13	593; 8; 2; 0;
4; 14:18:13	593; 3; -2; -2; cleared
4; 14:18:13	609; 6; -2; 0;
4; 14:18:14	156; 5; 1; -1;
4; 14:18:14	156; 1; 2; 1;
4; 14:18:14	468; 7; 0; -2;
4; 14:18:14	531; 4; -3; 0;
4; 14:18:15	125; 0; 0; 3;
4; 14:18:15	140; 2; 0; 2;
4; 14:18:16	328; 5; 1; -2;
4; 14:18:16	328; 7; -1; -3;
4; 14:18:16	343; 9; -1; -1;
4; 14:18:16	390; 6; -2; -1;
4; 14:18:16	656; 8; 2; -1;
4; 14:18:17	093; 1; 3; 2;
4; 14:18:17	093; 4; -2; 1;
4; 14:18:17	421; 0; 1; 4;
4; 14:18:17	421; 2; -1; 2;
4; 14:18:17	750; 3; -2; -2;; not_moved
4; 14:18:18	515; 7; -2; -4;
4; 14:18:18	953; 6; -3; -1;
4; 14:18:18	953; 3; -3; -3;
4; 14:18:18	968; 9; 0; -1;
4; 14:18:18	968; 8; 1; -2;
4; 14:18:19	281; 2; -2; 2;
4; 14:18:19	484; 5; 1; -3;
4; 14:18:20	156; 0; 2; 4;
4; 14:18:20	156; 4; -1; 1;
4; 14:18:20	484; 1; 3; 3;
4; 14:18:20	500; 3; -3; -4;
4; 14:18:20	921; 8; 0; -3;
4; 14:18:21	359; 2; -3; 1;
4; 14:18:21	359; 9; 0; -2;
4; 14:18:21	687; 5; 0; -4;
4; 14:18:22	125; 1; 2; 3;
4; 14:18:22	187; 7; -2; -5;
4; 14:18:22	562; 0; 3; 4;
4; 14:18:22	562; 8; 0; -4;
4; 14:18:22	781; 6; -4; -1;
4; 14:18:23	218; 4; 0; 2;
4; 14:18:23	281; 5; -1; -5;
4; 14:18:23	578; 9; 1; -2;
4; 14:18:24	203; 3; -4; -5;
4; 14:18:24	203; 2; -4; 0;
4; 14:18:24	421; 1; 1; 3;
4; 14:18:24	515; 8; -1; -4;
4; 14:18:24	750; 7; -1; -4;
4; 14:18:24	875; 0; 4; 4;
4; 14:18:25	187; 6; -4; -2;
4; 14:18:26	062; 4; 0; 3;
4; 14:18:26	062; 3; -5; -5;
4; 14:18:26	390; 7; 0; -3;
4; 14:18:26	531; 8; -2; -4;
4; 14:18:26	937; 2; -5; 0;
4; 14:18:26	937; 6; -4; -3;
4; 14:18:27	375; 0; 4; 3;
4; 14:18:27	375; 9; 2; -1;
4; 14:18:27	593; 5; -1; -5;; not_moved
4; 14:18:27	765; 5; 0; -5;
4; 14:18:28	468; 4; 1; 4;
4; 14:18:28	468; 1; 1; 3;; not_moved
4; 14:18:28	796; 6; -4; -4;
4; 14:18:28	796; 0; 4; 2; cleared
4; 14:18:28	812; 7; 1; -3;
4; 14:18:29	000; 2; -4; 1;
4; 14:18:29	062; 1; 0; 2;
4; 14:18:29	562; 3; -5; -4;
4; 14:18:29	750; 5; 1; -4;
4; 14:18:30	328; 8; -3; -4;
4; 14:18:30	328; 0; 4; 1;
4; 14:18:30	546; 7; 2; -2;
4; 14:18:30	562; 6; -3; -4;
4; 14:18:30	875; 1; -1; 1;
4; 14:18:30	984; 2; -3; 2;
4; 14:18:31	312; 3; -5; -3;
4; 14:18:31	312; 9; 2; -1;; not_moved
4; 14:18:31	750; 5; 2; -3; cleared
4; 14:18:31	843; 4; 0; 4;
4; 14:18:32	296; 6; -3; -5;
4; 14:18:32	734; 0; 4; 0;
4; 14:18:32	859; 3; -5; -2;
4; 14:18:33	281; 2; -2; 3;
4; 14:18:33	390; 7; 3; -1; cleared
4; 14:18:33	828; 5; 3; -2;
4; 14:18:34	265; 6; -2; -5;
4; 14:18:34	265; 8; -3; -4;; not_moved
4; 14:18:34	593; 4; -1; 3;
4; 14:18:34	593; 8; -4; -4;
4; 14:18:34	609; 9; 1; -2;
4; 14:18:34	609; 1; -2; 0;
4; 14:18:34	921; 3; -4; -1;
4; 14:18:35	140; 2; -1; 4;
4; 14:18:35	578; 7; 3; 0;
4; 14:18:35	578; 0; 3; 0;
4; 14:18:35	906; 5; 4; -1;
4; 14:18:36	343; 1; -3; -1;
4; 14:18:36	781; 9; 1; -3;
4; 14:18:36	781; 8; -4; -3;
4; 14:18:37	109; 6; -2; -4;
4; 14:18:37	156; 7; 3; 1;
4; 14:18:37	437; 2; 0; 5;
4; 14:18:37	437; 0; 2; -1;
4; 14:18:37	765; 3; -3; 0;
4; 14:18:37	781; 5; 4; 0;
4; 14:18:38	093; 4; -2; 2;
4; 14:18:38	093; 1; -2; -1;
4; 14:18:38	968; 8; -4; -2;
4; 14:18:39	296; 6; -1; -3;
4; 14:18:39	296; 5; 4; 1;
4; 14:18:39	359; 2; 1; 5;
4; 14:18:39	468; 0; 1; -2;
4; 14:18:39	953; 9; 0; -4;
4; 14:18:40	390; 3; -2; 1;
4; 14:18:40	406; 7; 3; 2;
4; 14:18:40	812; 1; -2; -2;
4; 14:18:40	937; 8; -4; -1;
4; 14:18:41	484; 0; 0; -3;
4; 14:18:41	812; 2; 2; 5;
4; 14:18:41	812; 5; 5; 2;
4; 14:18:42	140; 4; -2; 2;; not_moved
4; 14:18:42	140; 4; -3; 2;
4; 14:18:42	140; 3; -1; 2;
4; 14:18:42	187; 7; 2; 2;
4; 14:18:43	343; 6; -1; -3;; not_moved
4; 14:18:43	343; 1; -3; -3;
4; 14:18:43	343; 8; -3; 0;
4; 14:18:43	671; 9; -1; -4;
4; 14:18:43	671; 2; 2; 4;
4; 14:18:44	328; 5; 6; 3;
4; 14:18:44	328; 3; 0; 3;
4; 14:18:44	343; 4; -3; 1;
4; 14:18:45	093; 7; 1; 2;
4; 14:18:45	421; 1; -2; -3;
4; 14:18:45	968; 3; 1; 4;
4; 14:18:45	968; 8; -2; 0;
4; 14:18:45	984; 9; -2; -5;
4; 14:18:47	703; 6; 0; -2;
4; 14:18:47	703; 4; -4; 0;
4; 14:18:48	812; 9; -2; -4;
4; 14:18:49	468; 1; -2; -3;; not_moved
4; 14:18:49	468; 1; -3; -4;
4; 14:18:51	031; 6; 1; -2;
4; 14:18:51	656; 4; -4; -1;
4; 14:18:51	984; 9; -3; -5;
4; 14:18:54	500; 9; -4; -5;
4; 14:18:57	781; 9; -4; -4;
4; 14:19:00	843; 9; -4; -3;
5; 14:21:09	359; -1; 0; 0;
5; 14:21:20	515; 0; 1; 1;
5; 14:21:21	718; 1; 1; 1;
5; 14:21:21	718; 2; 1; 0;
5; 14:21:22	156; 5; 0; 1;
5; 14:21:22	156; 4; 1; 1;
5; 14:21:23	359; 3; 1; 1;
5; 14:21:23	359; 8; 1; 1;
5; 14:21:23	484; 2; 2; 1;
5; 14:21:24	015; 5; 1; 2;
5; 14:21:24	343; 1; 2; 2;
5; 14:21:24	343; 0; 1; 2;
5; 14:21:25	109; 4; 2; 2;
5; 14:21:25	437; 3; 2; 2;
5; 14:21:25	765; 2; 3; 2;
5; 14:21:26	203; 5; 2; 3;
5; 14:21:26	203; 8; 2; 2;
5; 14:21:26	968; 6; 1; 1;
5; 14:21:26	984; 0; 2; 3;
5; 14:21:27	515; 7; 1; 0;
5; 14:21:27	515; 9; 1; 1;
5; 14:21:27	843; 5; 2; 4;
5; 14:21:27	843; 1; 3; 3;
5; 14:21:27	937; 3; 2; 3;
5; 14:21:28	828; 6; 2; 2;
5; 14:21:28	890; 0; 2; 4;
5; 14:21:28	968; 4; 2; 2;; not_moved
5; 14:21:29	265; 8; 2; 3;
5; 14:21:29	328; 5; 3; 5;
5; 14:21:29	593; 9; 2; 2;
5; 14:21:29	703; 2; 3; 2;; not_moved
5; 14:21:30	140; 7; 2; 1;
5; 14:21:30	796; 4; 2; 3;
5; 14:21:31	234; 6; 2; 3;
5; 14:21:31	671; 5; 2; 5;
5; 14:21:31	671; 9; 2; 3;
5; 14:21:31	781; 1; 3; 3;; not_moved
5; 14:21:31	828; 0; 3; 5;
5; 14:21:31	843; 1; 3; 4;
5; 14:21:31	953; 3; 2; 3;; not_moved
5; 14:21:32	000; 3; 2; 4;
5; 14:21:32	328; 2; 4; 3;
5; 14:21:32	765; 4; 2; 4;
5; 14:21:33	312; 8; 2; 4;
5; 14:21:34	187; 7; 2; 1;; not_moved
5; 14:21:34	187; 0; 3; 6; NNug=2
5; 14:21:34	406; 2; 4; 4;
5; 14:21:34	406; 6; 2; 4;
5; 14:21:34	953; 9; 2; 4;
5; 14:21:34	953; 4; 2; 5;
5; 14:21:35	015; 3; 2; 5;
5; 14:21:35	281; 7; 3; 2;
5; 14:21:35	718; 5; 2; 5;; not_moved
5; 14:21:36	156; 1; 3; 4;; not_moved
5; 14:21:36	312; 8; 2; 5;
5; 14:21:36	328; 2; 3; 4;
5; 14:21:36	703; 4; 3; 6; NNug=2
5; 14:21:36	703; 3; 3; 6; NNug=2
5; 14:21:36	718; 1; 3; 5;
5; 14:21:36	765; 6; 3; 5;
5; 14:21:37	468; 5; 3; 6; NNug=2
5; 14:21:38	234; 0; 3; 6; NNug=2; not_moved
5; 14:21:38	781; 1; 3; 6; NNug=2
5; 14:21:38	921; 9; 2; 4;; not_moved
5; 14:21:39	328; 8; 3; 6; NNug=2
5; 14:21:39	328; 7; 3; 2;; not_moved
5; 14:21:39	656; 2; 3; 5;
5; 14:21:40	750; 4; 3; 6; NNug=2; not_moved
5; 14:21:40	750; 3; 3; 6; NNug=2; not_moved
5; 14:21:40	765; 6; 3; 6; NNug=2
5; 14:21:40	765; 9; 2; 5;
5; 14:21:41	515; 5; 3; 6; NNug=2; not_moved
5; 14:21:41	593; 2; 3; 6; NNug=2
5; 14:21:42	828; 7; 4; 3;
5; 14:21:42	828; 9; 3; 6; NNug=2
5; 14:21:42	843; 1; 3; 6; NNug=2; not_moved
5; 14:21:43	375; 8; 3; 6; NNug=2; not_moved
5; 14:21:44	906; 6; 3; 6; NNug=2; not_moved
5; 14:21:45	781; 2; 3; 6; NNug=2; not_moved
5; 14:21:45	781; 7; 5; 3;
5; 14:21:47	093; 9; 3; 6; NNug=2; not_moved
5; 14:21:48	515; 7; 5; 4;
5; 14:21:52	562; 7; 5; 4;; not_moved
5; 14:22:02	515; 7; 4; 4;
5; 14:22:04	921; 7; 3; 4;
5; 14:22:07	875; 7; 3; 5;
5; 14:22:10	281; 7; 3; 6; NNug=2
