# Supplementary material for: Leadership in Moving Human Groups
Source: PLoS Comput Biol. 2014 Apr 3;10(4):e1003541. doi: 10.1371/journal.pcbi.1003541 (PMC3974633; doi:10.1371/journal.pcbi.1003541)
Supplement: Software S1 — Archive version of the software which was used for the experiment. (ZIP) [file pcbi.1003541.s002.zip › replicate-config-files/hc_client.config]

// game_client.config
testing		= 	false			// false: fullscreen
autoRead    =   false           // 
autoMove    =   false           //
ip_nr		=	192.168.0.200   // the ip of the server
language	=	de			    // can be de for german or en for english
dlg_timeout =   5               // Anzeigedauer für die letzte Nachricht
