# Supplementary material for: Leadership in Moving Human Groups
Source: PLoS Comput Biol. 2014 Apr 3;10(4):e1003541. doi: 10.1371/journal.pcbi.1003541 (PMC3974633; doi:10.1371/journal.pcbi.1003541)
Supplement: Software S1 — Archive version of the software which was used for the experiment. (ZIP) [file pcbi.1003541.s002.zip › replicate-config-files/hc_panel.config]

// config GamePanel Colors RGB
testing = false			// true: show coord in some fields
// colors   here only grey shades
c_bg	= D8D8D8		// background	
c_fg	= 808080		// foreground tiling
c_nm	= 000000		// number of moves 
c_ng	= 000000		// nuggets
c_vis	= 000000		// visRad
c_my	= 000000		// my figure	
c_others= 000000		// other figures

n0		    = 20		// if more than n0 figures on the same field, display them smaller
tailLengthF = 3.0		// Factor for the length of the tails
tailWidthF  = 0.5		// factor for the width of the tails
my_zoom     = 2.0		// ZoomFactor for the players own avatar
lineWidth   = 3.0		// for the tiling stroke

radius	    = 40		// pixels radius of a single hexagon 
radiusPG    = 5			// radius of the playground measured in haxagons, should be an odd number
						//    corresponds with the same value in server_config

idelay5 = 8000			// ms initial delay after starting, before a first move can be done
delay	= 1500			// milliseconds, delay after every move
idle	= 4000			// milliseconds, tail of a moved figure is shown for that time
